## CORRECTION

# Correction: Non-centrosomal epidermal microtubules act in parallel to LET-502/ROCK to promote *C. elegans* elongation (doi:10.1242/dev.126615)

**Sophie Quintin, Shaohe Wang, Julien Pontabry, Ambre Bender, François Robin, Vincent Hyenne, Frédéric Landmann, Christelle Gally, Karen Oegema and Michel Labouesse**

There was an error in Development (2016) 143, 160-173 (doi: 10.1242/dev.126615).

The first name of the second author was spelled incorrectly. The online version has now been corrected.

The authors apologise to readers for this mistake.
